# Supplementary material for: An ionic liquid-mediated electrochemiluminescent sensor for the detection of sulfur dioxide at the ppb level
Source: Royal Society of Chemistry journal article supplement (doi:10.1039/c3an01407j), 2013-01-01
Supplement: c3an01407j.pdf [file c3an01407j.pdf]

## Electronic Supplementary Information

Ionic liquid-mediated electrochemiluminescent sensor  
for the detection of sulfur dioxide in the ppb-level

*Lichan Chen, Yuanjin Zhang, Shuyan Ren, Danjun Huang, Chen Zhou,  
Yuwu Chi,\* and Guonan Chen*

MOE Key Laboratory of Analysis and Detection Technology for Food Safety, Fujian  
Provincial Key Laboratory of Analysis and Detection Technology for Food Safety,  
and Department of Chemistry, Fuzhou University, Fujian 350108, China.

E-mail: [y.w.chi@fzu.edu.cn](mailto:y.w.chi@fzu.edu.cn);

Fax: (+86)591-2286-6137; Tel: (+86)591-2286-6137

**Table S1.** Characteristics of various SO<sub>2</sub> gas sensors

| Method                                  | Detection range | Detection limit   | Operating temperature | References |
|-----------------------------------------|-----------------|-------------------|-----------------------|------------|
| The proposed ECL sensor                 | 40 ~ 2000 ppb   | 20 ppb            | Room temperature      |            |
| Surface acoustic wave                   |                 | < 200 ppb         | 160 °C                | 1          |
| Solid state electrolyte                 | 1 ~ 50 ppm      | 1 ppm             | 300 °C                | 2          |
| Severinghaus type potentiometric sensor | 20 ~ 1000 ppb   | 20 ppb            | Room temperature      | 3          |
| Quartz crystal microbalance             | ~ ppm range     | 5 ppm             | 35 °C                 | 4          |
| Absorption spectroscopy                 |                 | 0.2 ppm per meter | Room temperature      | 5          |
| Fiber-optic sensor                      | 2 ~ 150 ppm     | 2 ppm             | Room temperature      | 6          |
| Fluorescence                            | 0.1 ~ 1600 ppm  | 20 ppb            | Room temperature      | 7          |
| Field-effect transistor                 | 0.25 ~ 1.8 %    | 0.05 %            | Room temperature      | 8          |

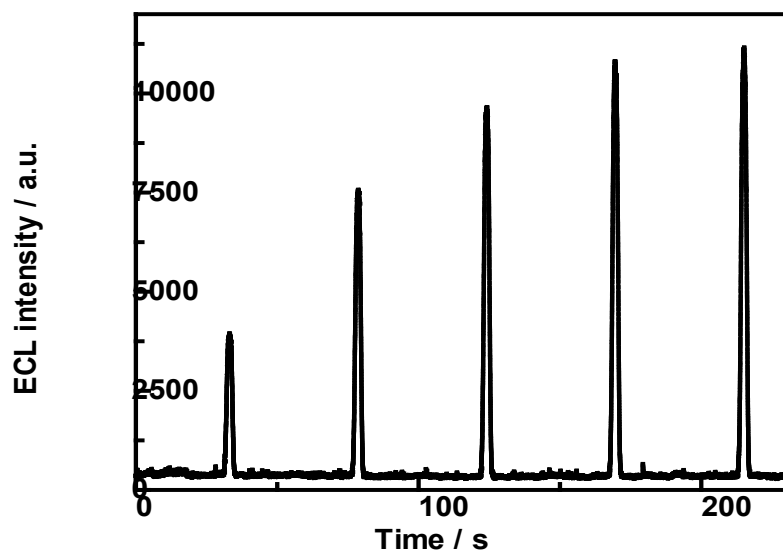

**Figure S1.** ECL response of IL-mediated Ru(bpy)<sub>3</sub><sup>2+</sup>/O<sub>2</sub> system obtained by consecutively scanning the potential of the working electrode between -1.0 and 1.3 V. The potential scan rate was 100 mV/s.

## References

- (1) Y. J. Lee, H. B. Kim, Y. R. Roh, H. M. Cho, and S. Baik, *Sens. Actuator, B* 1998, **64**, 173-178.
- (2) X. S. Liang, T. G. Zhong, B. F. Quan, B. Wang, and H. S. Guan, *Sens. Actuators, B* 2008, **134**, 25-30.
- (3) J. S. Symanski, and S. Bruchenstein, *Anal. Chem.* 1986, **58**, 1771-1777.
- (4) M. Albrecht, M. Schlupp, J. Bargon, G. van Koten, *Chem. Commun.* 2001, 1874-1875.
- (5) H. S. Wang, Y. G. Zhang, S. H. Wu, X. T. Lou, Z. G. Zhang, Y. K. Qin, *Appl. Phys. B* 2010, **100**, 637-641.
- (6) G. Dooly, E. Lewis, C. Fitzpatrick, *J. Opt. A: Pure Appl. Opt.* 2007, **9**, S24-S31.
- (7) H. Okabe, P. L. Splitstone, J. J. Ball, *J. Air Pollut. Contr. Assoc.* 1973, **23**, 514-516.
- (8) C. C. Cid, G. Jimenez-Cadena, J. Riu, A. Maroto, F. X. Rius, G. D. Batema, G. Can Koten, *Sens. Actuat. B* 2009, **141**, 97-103.
